# Supplementary material for: Evaluation of all-atom force fields in viral capsid simulations and properties
Source: Royal Society of Chemistry journal article supplement (doi:10.1039/d1ra08431c), 2021-12-21
Supplement: d1ra08431c1.pdf [file d1ra08431c1.pdf]

## Supplementary Information

# Evaluation of All-Atom Force Fields on Viral Capsid Simulations and Properties

Ruijie D. Teo\*, D. Peter Tieleman\*

Centre for Molecular Simulation and Department of Biological Sciences, University of Calgary,

Calgary AB T2N 1N4, Canada

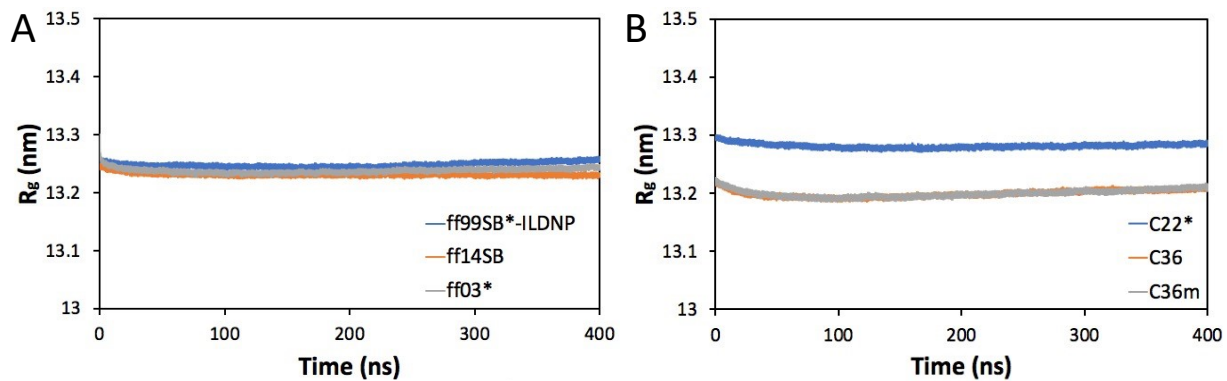

**Fig. S1** Radius of gyration  $R_g$  (nm) of the EV-D68 capsid versus time (ns) for the AMBER and CHARMM force fields.

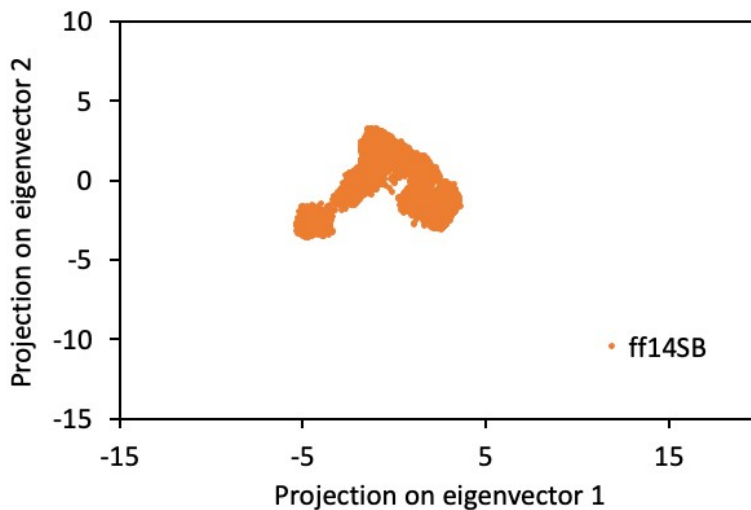

**Fig. S2** Projection of the coordinates from the 400 ns MD simulation on the top two eigenvectors (principal components) for ff14SB.

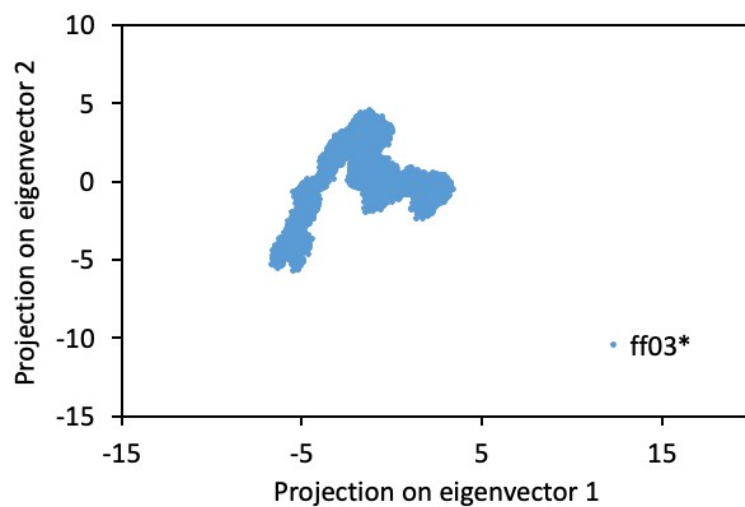

**Fig. S3** Projection of the coordinates from the 400 ns MD simulation on the top two eigenvectors (principal components) for ff03\*.

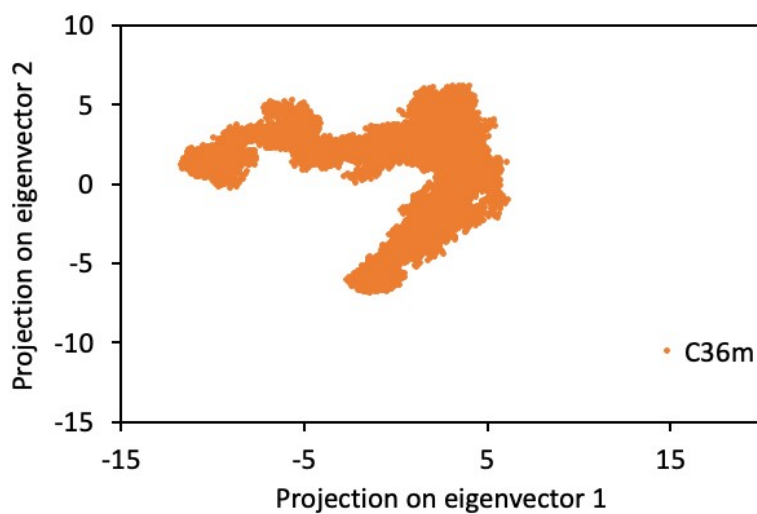

**Fig. S4** Projection of the coordinates from the 400 ns MD simulation on the top two eigenvectors (principal components) for C36m.

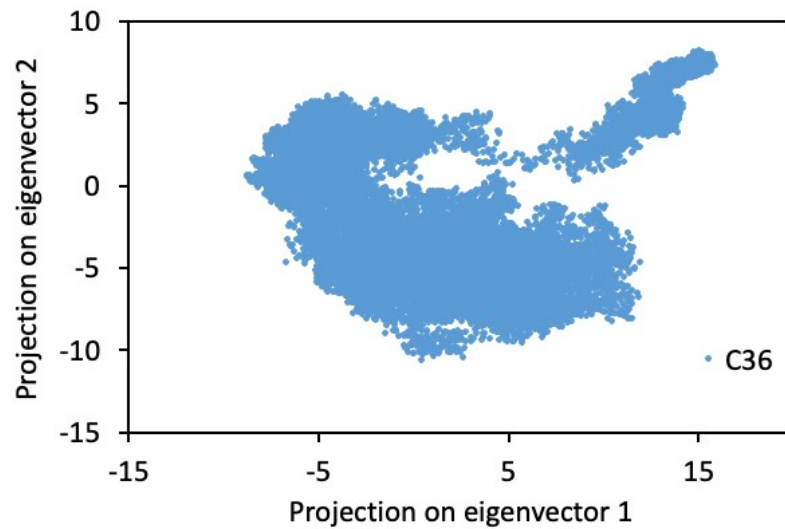

**Fig. S5** Projection of the coordinates from the 400 ns MD simulation on the top two eigenvectors (principal components) for C36.

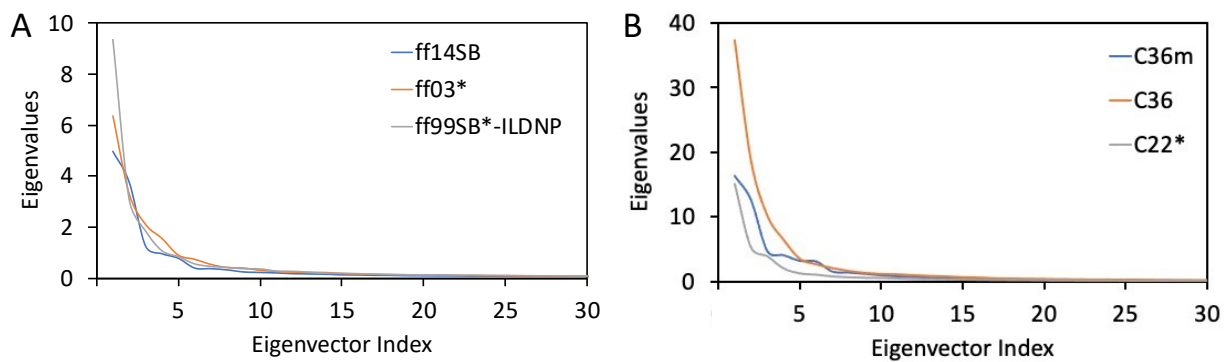

**Fig. S6** Eigenvalues of the covariance matrix of the atomic coordinates from MD trajectories obtained with the a) AMBER and b) CHARMM force field.

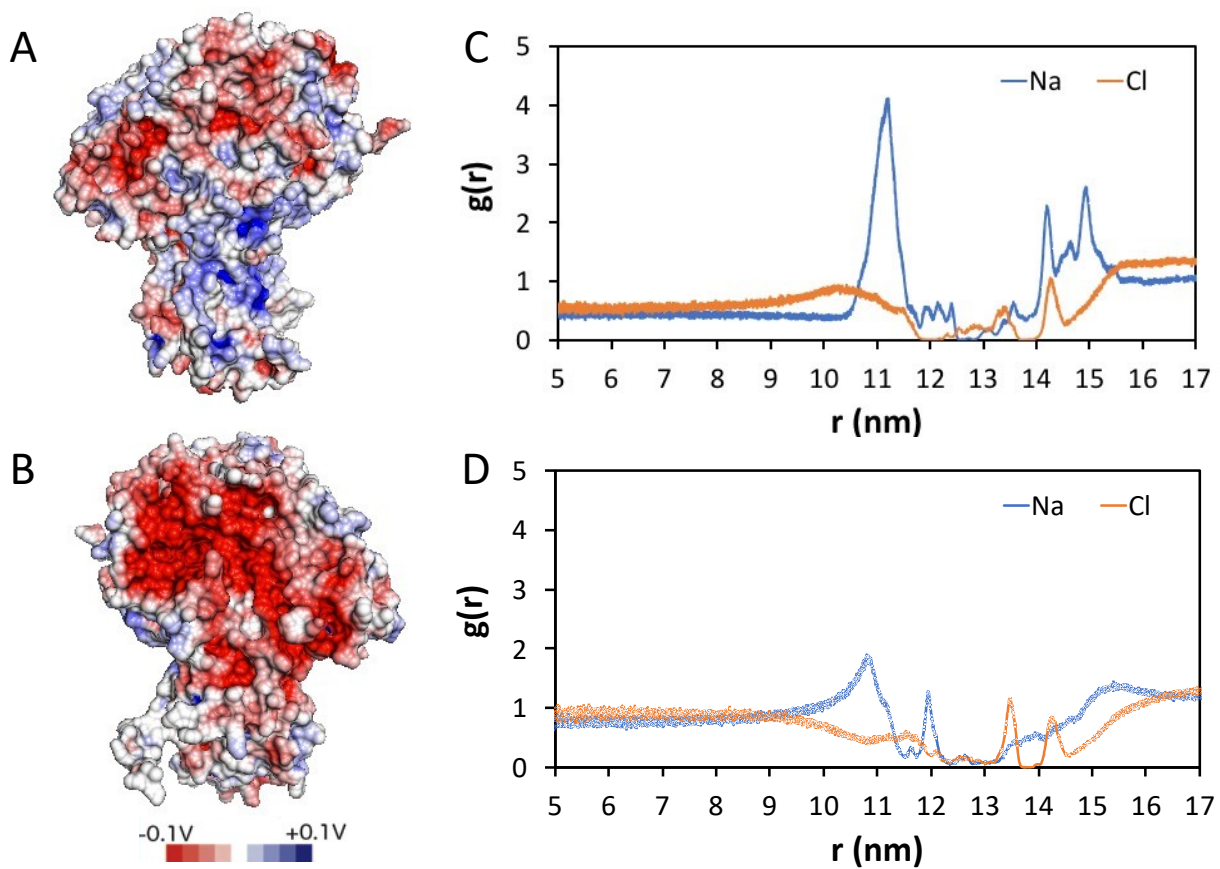

**Fig. S7** Electrostatic potential maps of the a) outer and b) inner surface of the viral capsomer, and the radial distribution function of the Na and Cl ions with respect to the center of mass obtained from the last 50 ns of the MD simulation using c) ff14SB and d) C36m.

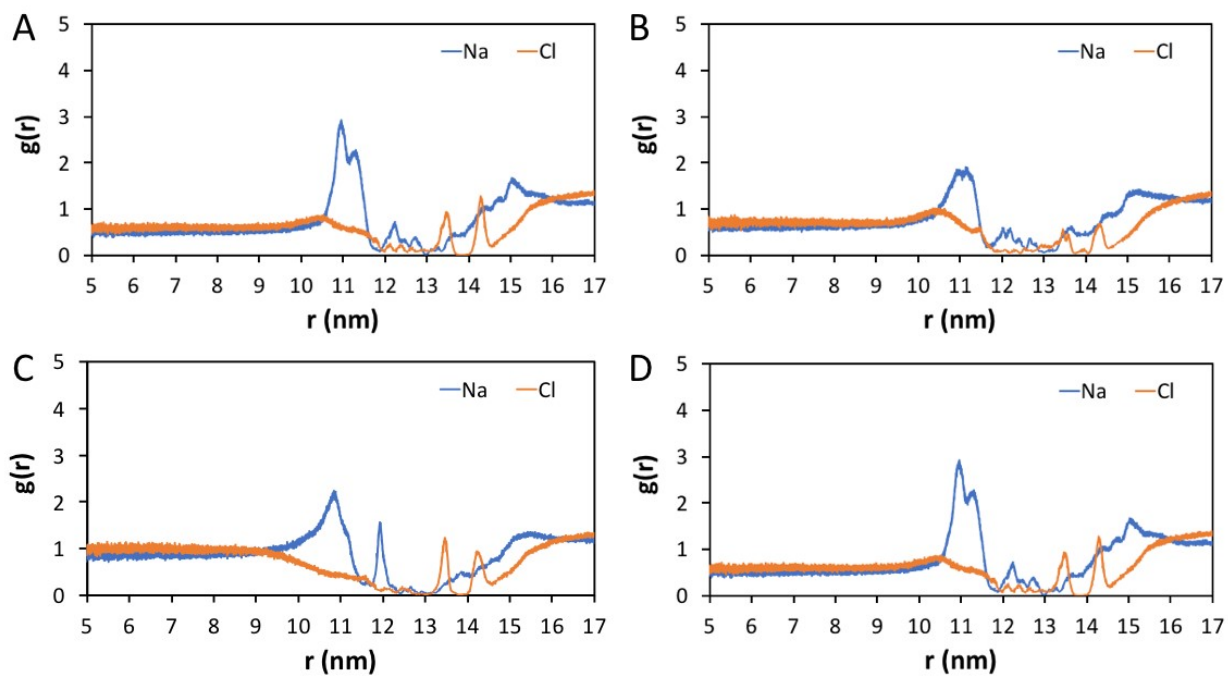

**Fig. S8** Radial distribution function of the Na and Cl ions with respect to the center of mass obtained from the last 50 ns of the MD simulation using a) ff03\*, b) ff99SB\*-ILDNP, c) C36 and d) C22\*.

**Table S1.** Number of clusters with an RMSD cutoff of 0.2 nm from MD snapshots sampled every 1 ns.

|               | ff14SB | ff03* | ff99SB*-ILDNP | C36m | C36 | C22* |
|---------------|--------|-------|---------------|------|-----|------|
| # of clusters | 2      | 5     | 3             | 16   | 19  | 5    |

**Table S2.** Percentage and composition of the capsid secondary structure corresponding to the minima of Fig. 3a (ff14SB) and 3d (C36m).

|        | Coil | $\beta$ -Sheet | $\beta$ -Bridge | Bend | Turn | $\alpha$ -Helix | $3_{10}$ -Helix |
|--------|------|----------------|-----------------|------|------|-----------------|-----------------|
| ff14SB | 30.9 | 29.3           | 3.6             | 14.9 | 10.9 | 5.2             | 5.2             |
| C36m   | 33.5 | 28.4           | 3.3             | 16.0 | 10.0 | 4.8             | 4.0             |

**Table S3.** Percentage and composition of the capsid secondary structure averaged across MD snapshots (sampled every 1 ns) generated using the six force fields.

|               | Coil | $\beta$ -Sheet | $\beta$ -Bridge | Bend | Turn | $\alpha$ -Helix | $3_{10}$ -Helix |
|---------------|------|----------------|-----------------|------|------|-----------------|-----------------|
| ff14SB        | 31.1 | 29.1           | 3.6             | 15.0 | 10.9 | 5.2             | 5.2             |
| ff03*         | 31.5 | 29.0           | 3.4             | 16.4 | 10.0 | 5.1             | 4.5             |
| ff99SB*-ILDNP | 31.0 | 29.6           | 3.6             | 15.6 | 10.4 | 4.8             | 5.1             |
| C36m          | 33.1 | 28.5           | 3.3             | 16.1 | 10.0 | 4.9             | 4.1             |
| C36           | 33.2 | 28.5           | 3.3             | 16.0 | 10.1 | 4.9             | 4.0             |
| C22*          | 32.5 | 28.9           | 3.3             | 15.5 | 10.2 | 5.1             | 4.4             |
